# Supplementary material for: Source apportionment of elevated wintertime PAHs by compound-specific radiocarbon analysis
Source: Copernicus journal article supplement (doi:10.5194/acp-9-3347-2009), 2009-05-25
Supplement: Supplementary file 1 [file acp-9-3347-2009-supplement.pdf]

## **Supplementary material for:**

### **Source apportionment of elevated wintertime PAHs by compound-specific radiocarbon analysis**

***Rebecca J. Sheesley<sup>\*</sup>, Martin Kruså, Patricia Krecl, Christer Johansson and Örjan Gustafsson***

Department of Applied Environmental Science (ITM), Stockholm University, 10691 Stockholm, Sweden

#### **Contents:**

5 pages

**Table S1.** Scheme of harvested PAH from GFF and PUF extracts combined for CSRA.

**Table S2.** PAH concentrations ( $\text{ng m}^{-3}$ ) in the particulate (GFF) and gas (PUF) Phases measured in Lycksele in winter 2006.

#### **Discussion of fossil contributions**

**Figure S1.** A graphical presentation of PAH/OC ratios for selected PAHs emitted by motor vehicles and biomass burning.

Table S1. Scheme of harvested PAH from particulate (GFF) and gas phase (PUF) extracts combined for CSRA.

| Substance/sample                                        | GFF            |                |                | PUF            |                | µg C for CSRA |
|---------------------------------------------------------|----------------|----------------|----------------|----------------|----------------|---------------|
|                                                         | 23 Jan - 6 Feb | 6 Feb - 20 Feb | 22 Feb - 8 Mar | 23 Jan- 31 Jan | 31 Jan - 6 Feb |               |
| <b>Phenantrene PUF</b>                                  |                |                |                | <b>X</b>       | <b>X</b>       | <b>44.6</b>   |
| <b>Phenanthrene GFF</b>                                 | <b>X</b>       |                | <b>X</b>       |                |                | <b>29.3</b>   |
| <b>Fluoranthene</b>                                     | <b>X</b>       | <b>X</b>       | <b>X</b>       |                |                | <b>65.8</b>   |
| <b>Pyrene</b>                                           | <b>X</b>       | <b>X</b>       | <b>X</b>       |                |                | <b>63.4</b>   |
| <b>Benzo[b+k]fluoranthene composite</b>                 | <b>X</b>       | <b>X</b>       | <b>X</b>       |                |                | <b>57.3</b>   |
| B[b]fluoranthene                                        | X              | X              | X              |                |                |               |
| B[k]fluoranthene                                        | X              | X              | X              |                |                |               |
| <b>Indeno[cd]pyrene + benzo[ghi]perylene composite</b>  | <b>X</b>       | <b>X</b>       | <b>X</b>       |                |                | <b>22.7</b>   |
| Indeno[cd]pyrene                                        |                | X              |                |                |                |               |
| Benzo[ghi]perylene                                      | X              | X              | X              |                |                |               |
| <b>Sum PAHs</b>                                         | <b>X</b>       | <b>X</b>       | <b>X</b>       | <b>X</b>       | <b>X</b>       | <b>196.7</b>  |
| Phenanthrene                                            |                | X              |                |                |                |               |
| Anthracene                                              | X              | X              | X              | X              | X              |               |
| 2-Methylanthracene                                      | X              | X              | X              | X              | X              |               |
| 4H-Cyclopenta[def]-phenantrene plus 9-methylphenantrene | X              | X              | X              | X              | X              |               |
| 1-Methylanthracene                                      | X              | X              | X              | X              | X              |               |
| 1-Methylphenantrene                                     | X              | X              | X              | X              | X              |               |
| 2-Phenylnaphtalene                                      | X              | X              | X              | X              | X              |               |
| Fluoranthene                                            |                |                |                | X              | X              |               |
| Pyrene                                                  |                |                |                | X              | X              |               |
| Benzo(a)flourene                                        |                | X              |                |                |                |               |
| Benzo(e)flourene                                        | X              | X              | X              |                |                |               |
| 2-Methylpyrene                                          | X              | X              | X              |                |                |               |
| X-Methylpyrene                                          | X              | X              | X              |                |                |               |
| 1-Methylpyrene                                          | X              | X              | X              |                |                |               |
| Benzo[ghi]fluoranthene                                  | X              | X              | X              |                |                |               |
| Benz[a]anthracene                                       | X              | X              | X              |                |                |               |
| Chrysene                                                | X              | X              | X              |                |                |               |
| Benzo[e]pyrene                                          | X              | X              | X              |                |                |               |
| Benzo[a]pyrene                                          | X              | X              | X              |                |                |               |
| Perylene                                                | X              | X              | X              |                |                |               |
| Indeno[cd]pyrene                                        | X              |                | X              |                |                |               |
| Coronene                                                | X              | X              | x              |                |                |               |

Compounds in bold were harvested for CSRA, while compounds in normal type have been pooled for compound class-specific radiocarbon analysis (CCSRA).

GFF is glass fiber filter which collects particle-phase material.

PUF is polyurethane foam which collects gas-phase organic components.

**Table S2.** PAH concentrations ( $\text{ng m}^{-3}$ ) in the particulate (GFF) and gas (PUF) phases measured in Lycksele in winter 2006.

| PAH                      | GFF <sup>a</sup> | PUF <sup>b</sup> | GFF+PUF |
|--------------------------|------------------|------------------|---------|
| Phenanthrene             | 2.26             | 8.97             | 11.3    |
| Anthracene               | 0.15             | 1.02             | 1.17    |
| 2-Methylanthracene       | 0.03             | 0.05             | 0.08    |
| 1-Methylphenanthrene     | 0.34             | 0.33             | 0.68    |
| 2-Phenylnaphthalene      | 0.44             | 0.37             | 0.83    |
| 1,7-Dimethylphenanthrene | 0.10             | 0.12             | 0.22    |
| Fluoranthene             | 3.87             | 1.27             | 5.22    |
| Pyrene                   | 3.67             | 0.86             | 4.60    |
| Retene                   | 1.41             | 0.36             | 1.77    |
| Benzo[a]fluorene         | 0.83             | 0.09             | 0.93    |
| Benzo[b]fluorene         | 0.35             | 0.03             | 0.38    |
| 2-Methylpyrene           | 0.16             | 0.02             | 0.18    |
| 1-Methylpyrene           | 0.20             | 0.02             | 0.22    |
| Benzo[ghi]fluoranthene   | 1.13             | 0.06             | 1.18    |
| Cyclopenta[cd]pyrene     | 0.53             | 0.01             | 0.54    |
| Benzo[a]anthracene       | 0.95             | ND               | 0.95    |
| Chrysene                 | 2.79             | 0.07             | 2.83    |
| Benzo[b]fluoranthene     | 2.72             | ND               | 2.71    |
| Benzo[k]fluoranthene     | 3.29             | ND               | 3.25    |
| Benzo[e]pyrene           | 1.16             | ND               | 1.15    |
| Benzo[a]pyrene           | 1.13             | 0.02             | 1.15    |
| Perylene                 | 0.13             | ND               | 0.13    |
| Indeno[1,2,3-cd]pyrene   | 4.19             | ND               | 4.15    |
| Pentacene                | 0.31             | ND               | 0.31    |
| Dibenz[a,h]anthracene    | 0.95             | ND               | 0.94    |
| Benzo[ghi]perylene       | 6.38             | ND               | 6.32    |
| Coronene                 | 1.26             | ND               | 1.26    |

<sup>a</sup>Mean concentration normalized by sample duration, 23 Jan. – 8 Mar. <sup>b</sup>Mean concentration normalized by sample duration, 23 Jan. – 6 Feb. ND: not determined.

## Discussion of fossil contributions in Lycksele.

PAH/OC ratios from published gasoline and diesel emissions analysis (Riddle et al., 2007; Lough et al., 2007; Rogge et al., 1993) were used to calculate OC contributions based on the indeno[1,2,3-cd]pyrene plus benzo[ghi]perylene ambient concentrations (Table S3). These calculations illustrate two key points: PAH/OC ratios are quite variable and dependent upon vehicle conditions and the two gasoline references are the only ones which come close to the fossil TOC contribution as estimated by isotopic mass balance modeling. It should be noted that the ratios give an estimate of ambient OC not TOC, so these values would be expected to be biased low not high. Vehicle registration for Lycksele kommun, which includes both the city and surrounding area, indicates 86% gasoline 14% diesel (Granlund, H. and Fjällstedt, K., personal communication, 2009). These values give an indication of relative importance but still require input of source profiles in order to scale from number of vehicles to potential emission impacts. The combination of additional emission ratios for PAHs and vehicle registration numbers gives greater credence to the assertion that gasoline vehicle exhaust is dominant for fossil carbon in Lycksele, but does not prove that gasoline is the sole source of fossil PAH in Lycksele.

**Table S3.** Estimates of ambient fossil organic carbon based on published PAH/OC ratios for motor vehicle exhaust.

| Ambient fossil concentration | ng m <sup>-3</sup>  | µg m <sup>-3</sup>        |
|------------------------------|---------------------|---------------------------|
| I[cd]P+B[ghi]P               | 3.1                 |                           |
| TOC                          |                     | 0.7                       |
| Fossil sources               |                     |                           |
|                              | (I[cd]P+B[ghi]P)/OC | Estimated OC <sup>a</sup> |
| Diesel 2001                  | 6.34E-06            | 489                       |
| HDD 1987                     | 1.20E-05            | 258                       |
| Gasoline-2001                | 8.45E-04            | 4                         |
| Gasoline-1991                | 9.30E-04            | 3                         |
| idle/creep HDD 1999          | 3.30E-05            | 94                        |
| HDD-1998 ave                 | 1.21E-05            | 257                       |

<sup>a</sup> µg m<sup>-3</sup>

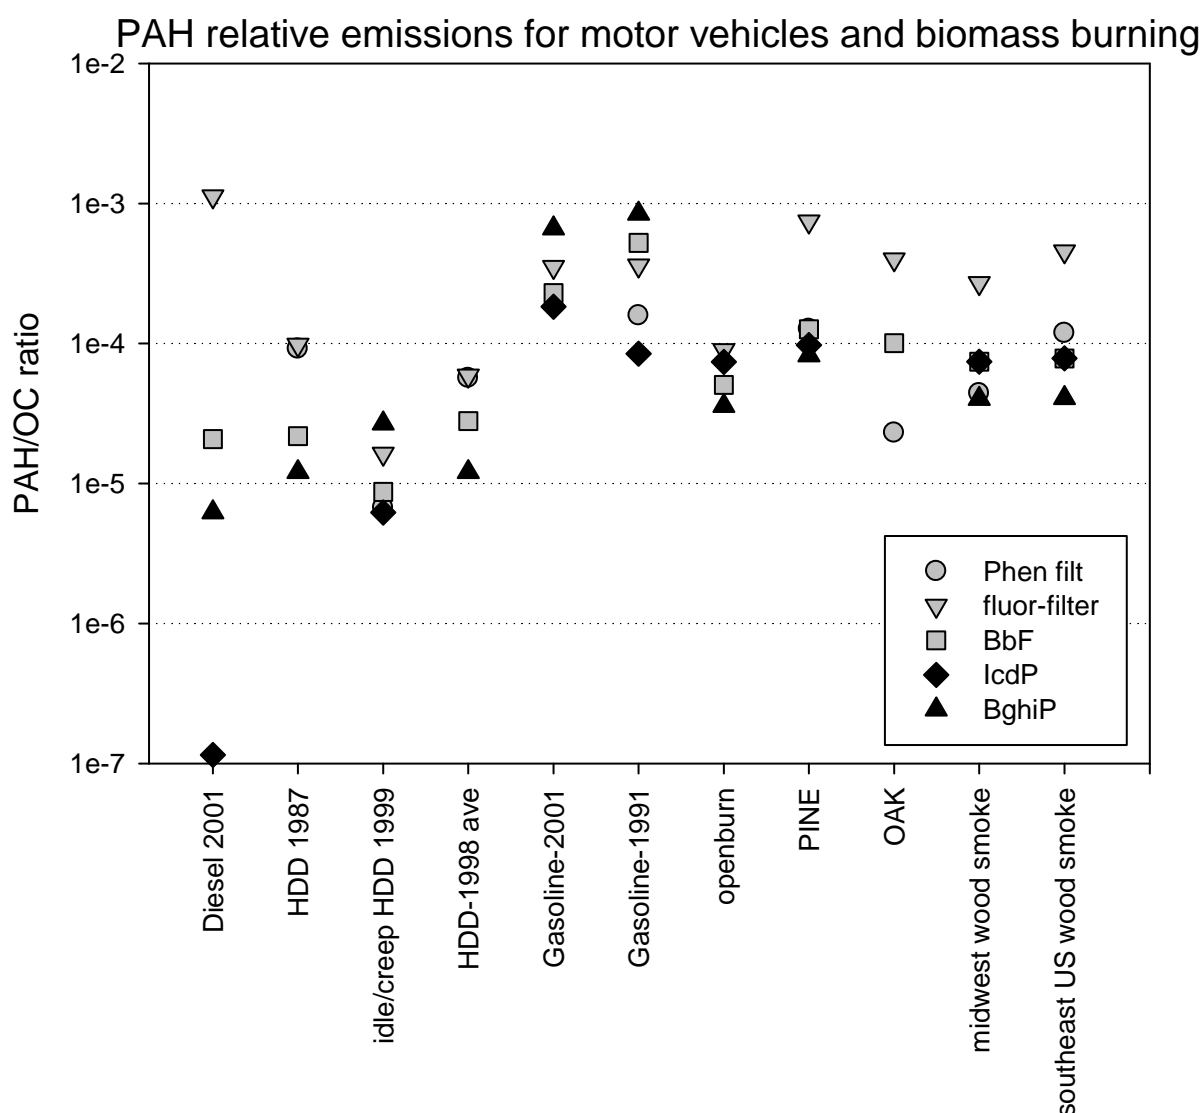

**Figure S1.** PAH/OC ratio for selected PAHs emitted by motor vehicles and biomass burning (OC is organic carbon as defined by the NIOSH 5040 method using the Sunset Labs thermal-optical instrument). For motor vehicle exhaust the date represents the vehicle year unless otherwise noted: diesel 2001 and gasoline 2001 (test year for averaged profile) exhaust values are from Lough et al. (2007); HDD 1987 (heavy duty diesel) and gasoline 1991 (test year) from Rogge et al (1993); HDD idle/creep 1999 and HDD 1998 are from Riddle et al (2007). It should be noted that for Riddle et al (2007), 3 other HDD vehicles emitted no detectable IcdP or BhiP. (For biomass burning and residential wood smoke openburn values represent average results from a prescribed field burn in Georgia, USA (Lee et al., 2005); pine and oak wood smoke profiles are from Schauer et al. (2001); Midwest and Southeast wood ratios are based on average profiles (Sheesley et al., 2007) for wood indigenous to the Midwest and Southeast regions in the USA (Fine et al., 2001, 2004, 2002).

## References

- Fine, P. M., Cass, G. R., and Simoneit, B. R. T.: Chemical characterization of fine particle emissions from fireplace combustion of woods grown in the northeastern United States, *Environ. Sci. Technol.*, 35, 2665-2675, 2001.
- Fine, P. M., Cass, G. R., and Simoneit, B. R. T.: Chemical characterization of fine particle emissions from the fireplace combustion of woods grown in the southern United States, *Environ. Sci. Technol.*, 36, 1442-1451, 2002.
- Fine, P. M., Cass, G. R., and Simoneit, B. R. T.: Chemical characterization of fine particle emissions from the fireplace combustion of wood types grown in the Midwestern and Western United States, *Environmental Engineering Science*, 21, 387-409, 2004.
- Lee, S., Baumann, K., Schauer, J. J., Sheesley, R. J., Naeher, L. P., Meinardi, S., Blake, D. R., Edgerton, E. S., Russell, A. G., and Clements, M.: Gaseous and particulate emissions from prescribed burning in Georgia, *Environ. Sci. Technol.*, 39, 9049-9056, 2005.
- Lough, G. C., Christensen, C. G., Schauer, J. J., Tortorelli, J., Mani, E., Lawson, D. R., Clark, N. N., and Gabele, P. A.: Development of molecular marker source profiles for emissions from on-road gasoline and diesel vehicle fleets, *J. Air Waste Manage. Assoc.*, 57, 1190-1199, 2007.
- Riddle, S. G., Robert, M. A., Jakober, C. A., Hannigan, M. P., and Kleeman, M. J.: Size distribution of trace organic species emitted from heavy-duty diesel vehicles, *Environ. Sci. Technol.*, 41, 1962-1969, 2007.
- Rogge, W. F., Hildemann, L. M., Mazurek, M. A., Cass, G. R., and Simoneit, B. R. T.: Sources of Fine Organic Aerosol .2. Noncatalyst and Catalyst- Equipped Automobiles and Heavy-Duty Diesel Trucks, *Environ. Sci. Technol.*, 27, 636-651, 1993.
- Schauer, J. J., Kleeman, M. J., Cass, G. R., and Simoneit, B. R. T.: Measurement of emissions from air pollution sources. 3. C-1-C- 29 organic compounds from fireplace combustion of wood, *Environ. Sci. Technol.*, 35, 1716-1728, 2001.
- Sheesley, R. J., Schauer, J. J., Zheng, M., and Wang, B.: Sensitivity of molecular marker-based CMB models to biomass burning source profiles, *Atmos. Environ.*, 41, 9050-9063, 2007.
